# Supplementary material for: ATP evokes Ca2+ signals in cultured foetal human cortical astrocytes entirely through G protein‐coupled P2Y receptors
Source: PubMed Central journal article supplement (PMC5601250; doi:10.1111/jnc.14119), 2017-08-02
Supplement: JNC-142-876-s001.pdf [file JNC-142-876-s001.pdf]

## SUPPORTING INFORMATION

### ATP evokes Ca<sup>2+</sup> signals in cultured foetal human cortical astrocytes entirely through G protein-coupled P2Y receptors

Margit S. Muller and Colin W. Taylor

*Department of Pharmacology, University of Cambridge, Tennis Court Road, Cambridge, CB2 1PD, United Kingdom.*

**Table S1.** Properties of the drugs used

| <b>Drug</b>  | <b>Action<sup>1</sup></b>                                                                                                                                                               | <b>Target in context of detected mRNA<sup>2</sup></b>        |
|--------------|-----------------------------------------------------------------------------------------------------------------------------------------------------------------------------------------|--------------------------------------------------------------|
| ADP          | Agonist of P2Y <sub>1</sub> , P2Y <sub>12</sub> , P2Y <sub>13</sub> , and possibly P2Y <sub>6</sub> receptors                                                                           | Agonist of P2Y <sub>1</sub> and P2Y <sub>6</sub> receptors   |
| ATP          | Agonist of P2Y and P2X receptors                                                                                                                                                        | Agonist of P2Y and P2X receptors                             |
| 2'-amino-UTP | Agonist of P2Y <sub>2</sub> receptors                                                                                                                                                   | Agonist of P2Y <sub>2</sub> receptors                        |
| 2-APB        | Inhibits IP <sub>3</sub> R and SOCE                                                                                                                                                     |                                                              |
| BzATP        | Agonist of all P2X subtypes, high affinity for P2X <sub>1</sub> , most commonly used as a P2X <sub>7</sub> agonist, full agonist at human P2X <sub>5</sub> with affinity similar to ATP | Agonist of P2X <sub>5</sub> receptors                        |
| BTP-2        | Inhibits SOCE                                                                                                                                                                           |                                                              |
| 2'-thio-UTP  | Agonist of P2Y <sub>2</sub> receptors                                                                                                                                                   | Agonist of P2Y <sub>2</sub> receptors                        |
| α,β-meATP    | Agonist of P2X <sub>1</sub> , P2X <sub>3</sub> , human P2X <sub>4</sub> and P2X <sub>4/6</sub> receptors                                                                                | Agonist of P2X <sub>4</sub> and P2X <sub>4/6</sub> receptors |
| MRS2365      | Agonist of P2Y <sub>1</sub> receptors                                                                                                                                                   | Agonist of P2Y <sub>1</sub> receptors                        |
| NF546        | Agonist of P2Y <sub>11</sub> receptors                                                                                                                                                  | Agonist of P2Y <sub>11</sub> receptors                       |
| SKF96365     | Inhibits SOCE                                                                                                                                                                           |                                                              |
| Thapsigargin | Inhibits ER/SR Ca <sup>2+</sup> -ATPase (ER Ca <sup>2+</sup> pump)                                                                                                                      |                                                              |
| U73122       | Inhibits PLC                                                                                                                                                                            |                                                              |
| U73343       | Inactive analogue of U73122                                                                                                                                                             |                                                              |
| UDP          | Agonist of P2Y <sub>6</sub> and P2Y <sub>14</sub> receptors                                                                                                                             | Agonist of P2Y <sub>6</sub> receptors                        |
| UTP          | Agonist of P2Y <sub>2</sub> , P2Y <sub>4</sub> and P2Y <sub>11</sub> receptors                                                                                                          | Agonist of P2Y <sub>2</sub> and P2Y <sub>11</sub> receptors  |

<sup>1</sup>The pharmacology of P2 receptor agonists is described in von Kugelgen & Hoffmann (2015), and Syed & Kennedy (2012).

<sup>2</sup>Targets of the agonists are described in the context of the P2X and P2Y receptors for which mRNA was detected in cultured foetal cortical human astrocytes (Fig. 1E).

**Table S2.** Primers used for qPCR analyses

| <b>Purinoceptor</b> | <b>Quantitect Primers</b> |
|---------------------|---------------------------|
| P2Y <sub>1</sub>    | Hs_PURINOCEPTORY1_1_SG    |
| P2Y <sub>2</sub>    | Hs_PURINOCEPTORY2_1_SG    |
| P2Y <sub>4</sub>    | Hs_PURINOCEPTORY4_1_SG    |
| P2Y <sub>6</sub>    | Hs_PURINOCEPTORY6_2_SG    |
| P2Y <sub>11</sub>   | Hs_PURINOCEPTORY11_1_SG   |
| P2Y <sub>12</sub>   | Hs_PURINOCEPTORY12_2_SG   |
| P2Y <sub>13</sub>   | Hs_PURINOCEPTORY13_1_SG   |
| P2Y <sub>14</sub>   | Hs_PURINOCEPTORY14_1_SG   |
| P2X <sub>1</sub>    | Hs_PURINOCEPTORX1_1_SG    |
| P2X <sub>2</sub>    | Hs_PURINOCEPTORX2_1_SG    |
| P2X <sub>3</sub>    | Hs_PURINOCEPTORX3_1_SG    |
| P2X <sub>4</sub>    | Hs_PURINOCEPTORX4_1_SG    |
| P2X <sub>5</sub>    | Hs_PURINOCEPTORX5_1_SG    |
| P2X <sub>6</sub>    | Hs_PURINOCEPTORX6_1_SG    |
| P2X <sub>7</sub>    | Hs_PURINOCEPTORX7_1_SG    |

All primers were from Qiagen.

**Table S3.** Ca<sup>2+</sup> signals evoked by P2Y-selective agonists in cultured human foetal astrocytes

| <b>Agonist</b> | <b>Activity<sup>1</sup></b> | <b>Δ[Ca<sup>2+</sup>]<sub>i</sub></b> |                                 |          |
|----------------|-----------------------------|---------------------------------------|---------------------------------|----------|
|                |                             | <b>pEC<sub>50</sub>,<br/>M</b>        | <b>Maximal<br/>response, nM</b> | <b>n</b> |
| ATP            | 1, 2, 6, 11                 | 5.94 ± 0.03                           | 180 ± 14                        | 8        |
| ADP            | 1, 6                        | 6.00 ± 0.11                           | 127 ± 10                        | 3        |
| MRS2365        | 1                           | 6.20 ± 0.19                           | 97 ± 8                          | 5        |
| UDP            | 6                           | ND                                    | 1 ± 1                           | 3        |
| UTP            | 2, 11                       | 4.86 ± 0.18                           | 58 ± 4                          | 5        |
| 2'-thio-UTP    | 2                           | 4.87 ± 0.47                           | 71 ± 3                          | 3        |
| 2'-amino-UTP   | 2                           | 4.57 ± 0.22                           | 51 ± 13                         | 3        |
| NF546          | 11                          | ND                                    | 4 ± 3                           | 3        |

<sup>1</sup>Activity at the four P2Y subtypes for which mRNA was detected in human astrocytes (P2Y<sub>1</sub>, P2Y<sub>2</sub>, P2Y<sub>6</sub> and P2Y<sub>11</sub>) (Fig. 1E). ND, not determined.

### Supporting references

- Syed, N.-i.-H. and Kennedy, C. (2012) Pharmacology of P2X receptors. *WIREs Membr Transp Signal*, **1**, 16-30.
- von Kugelgen, I. and Hoffmann, K. (2015) Pharmacology and structure of P2Y receptors. *Neuropharmacol.*, **104**, 50-61.

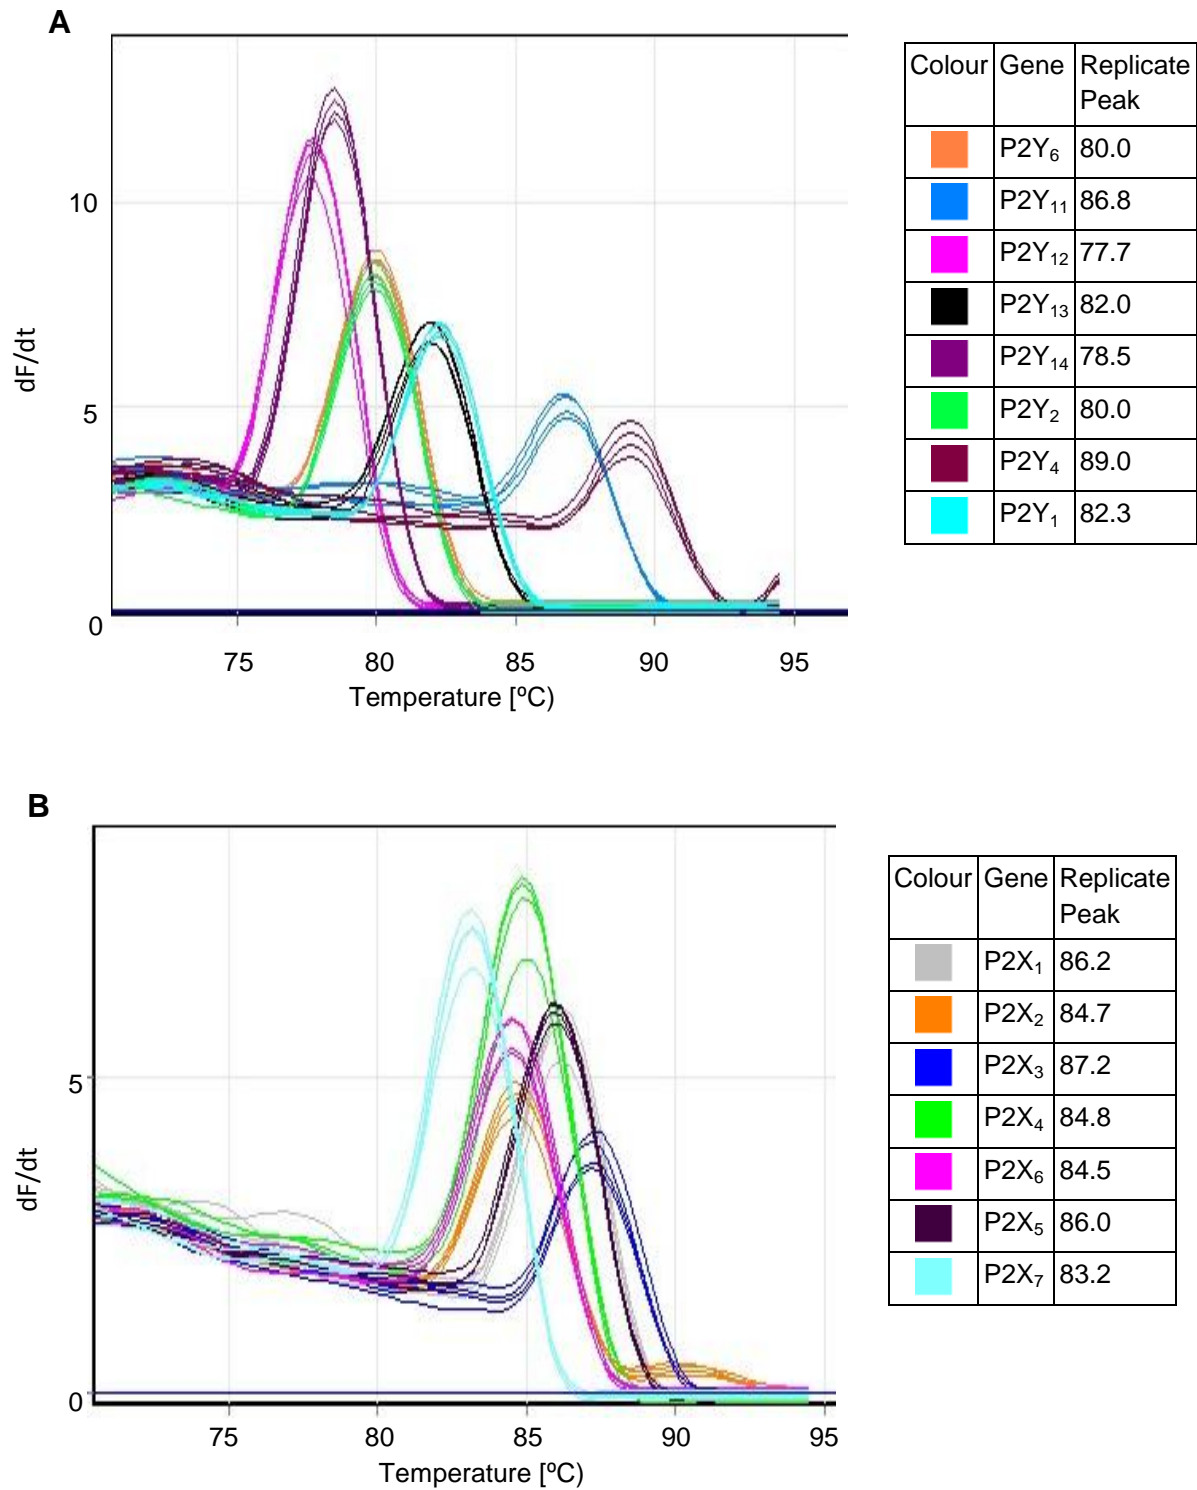

**Fig. S1** Melting curves for qPCR analyses of the expression of purinoreceptor subtypes. (A, B) Traces show the rate of change of SYBR green fluorescence ( $dF/dt$ ) as a function of temperature for the primers used to selectively amplify mRNA (Table S2) from BioBank pooled cDNA for the indicated P2Y receptors (A) or P2X receptors (B). Results show four separate determinations for each primer pair. The mean peak of each melting curve is shown in the tables.

**A**

Donor: 0000289765

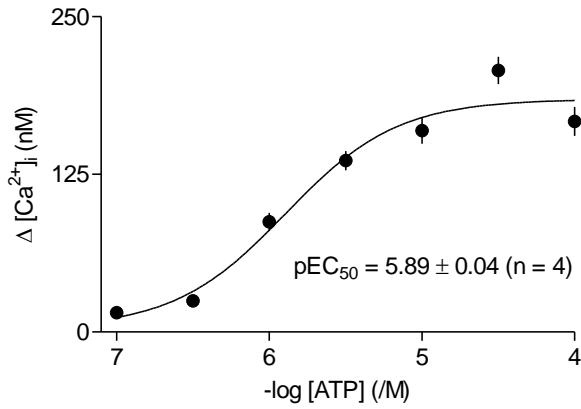**B**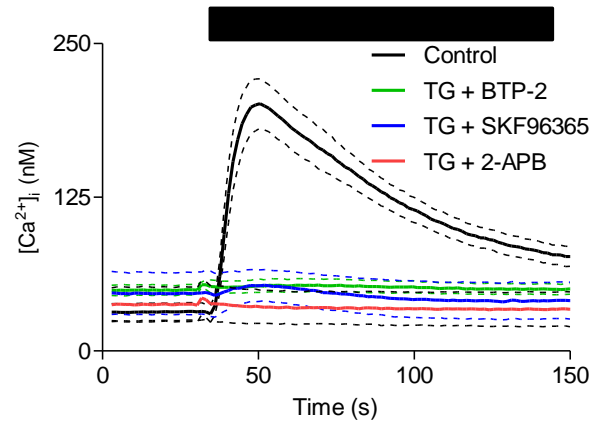

Donor: 0000402839

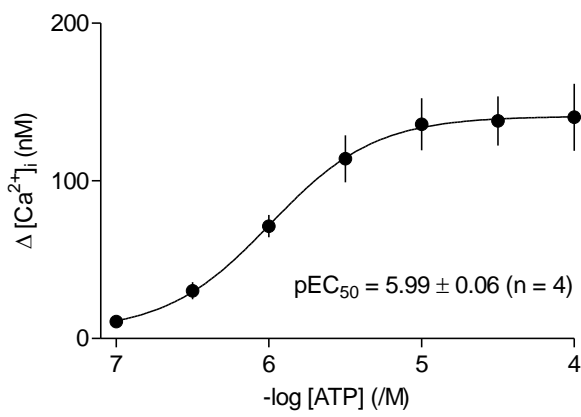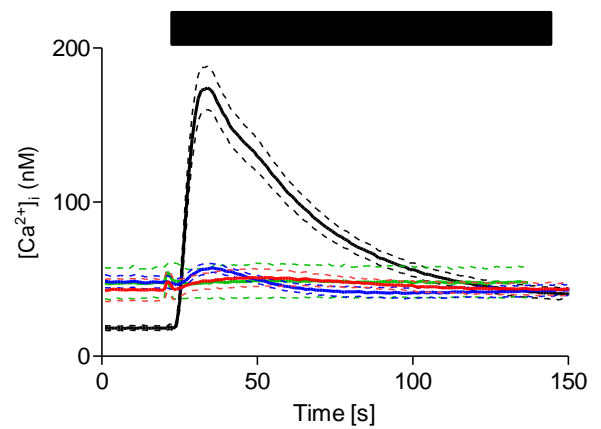

Donor: 0000514417

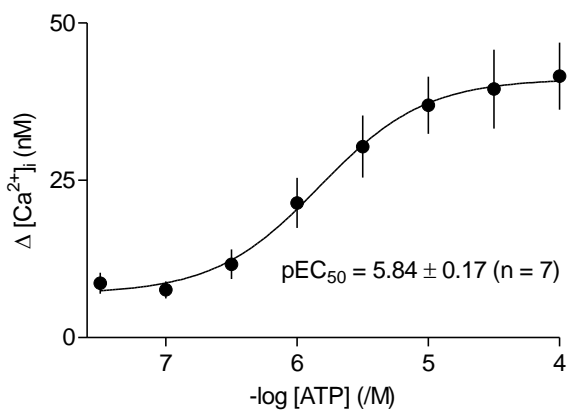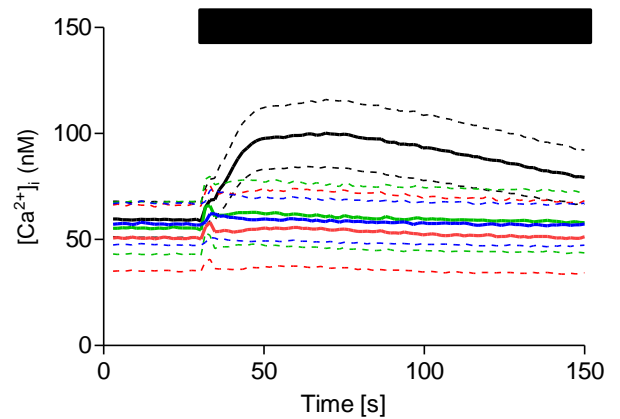

**Fig. S2** ATP evokes  $Ca^{2+}$  signals through P2Y receptors in astrocytes from three donors. (A) Concentration-dependent effects of ATP on the peak increase in  $[Ca^{2+}]_i$  in cells from the indicated donors.  $pEC_{50}$  values are shown for each donor. Results show means  $\pm$  SEM, n = 4-7. Pooled results from the first 2 donors are shown in Fig. 1B. (B) Traces show responses to ATP (100  $\mu$ M, solid bar) added to cells in HBS alone or after treatment with thapsigargin (5  $\mu$ M, 15 min) with the indicated inhibitors of SOCE (concentrations defined in Fig. 2D). Results show mean (solid line)  $\pm$  SEM (or range for n = 2, dashed lines), n = 2-7. Summary results from the first 2 donors are shown in Fig. 2F.

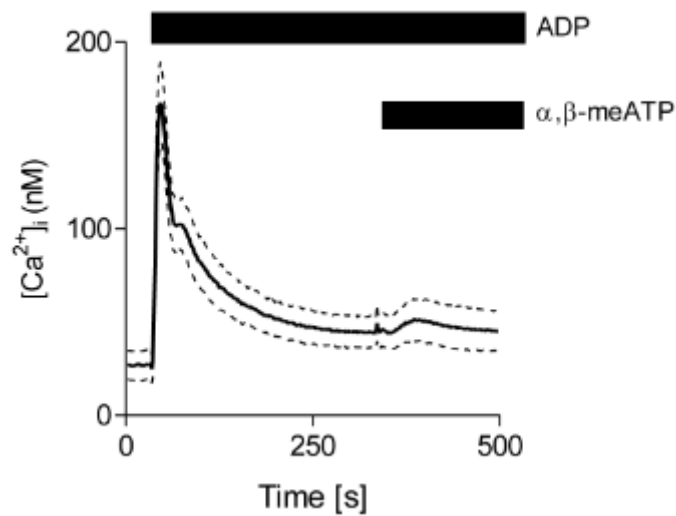

**Fig. S3** Stimulation of P2Y receptors does not cause translocation of functional P2X receptors to the plasma membrane. Populations of fluo-8-loaded astrocytes in HBS were stimulated with ADP (100  $\mu$ M) to selectively activate P2Y receptors and then with  $\alpha,\beta$ -meATP (30  $\mu$ M) to allow selective activation of P2X receptors. Traces show  $[Ca^{2+}]_i$  as means (solid line)  $\pm$  SEM (dashed line),  $n = 3$ .

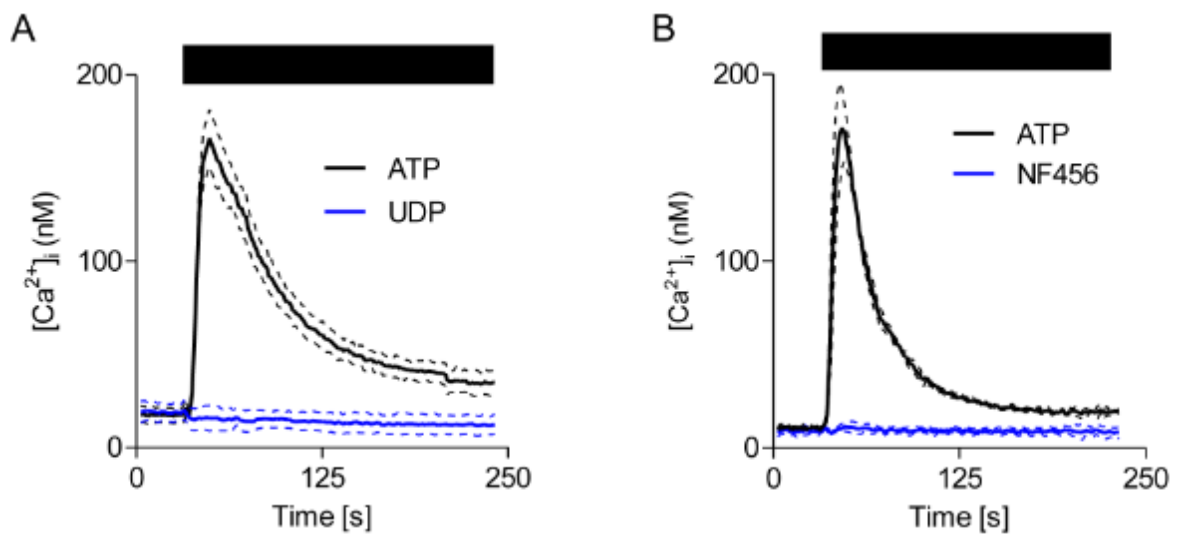

**Fig. S4** Neither P2Y<sub>6</sub> nor P2Y<sub>11</sub> receptors evoke  $Ca^{2+}$  signals in cultured human foetal astrocytes. (A,B) Responses of cell populations in HBS to ATP (100  $\mu$ M) or UDP (300  $\mu$ M, agonist of P2Y<sub>6</sub> receptor) (A), or NF456 (3  $\mu$ M, agonist of P2Y<sub>11</sub> receptor) (B), each applied for the periods shown by solid bars. Traces show  $[Ca^{2+}]_i$  as means (solid line)  $\pm$  SEM (dashed line),  $n = 3$ .

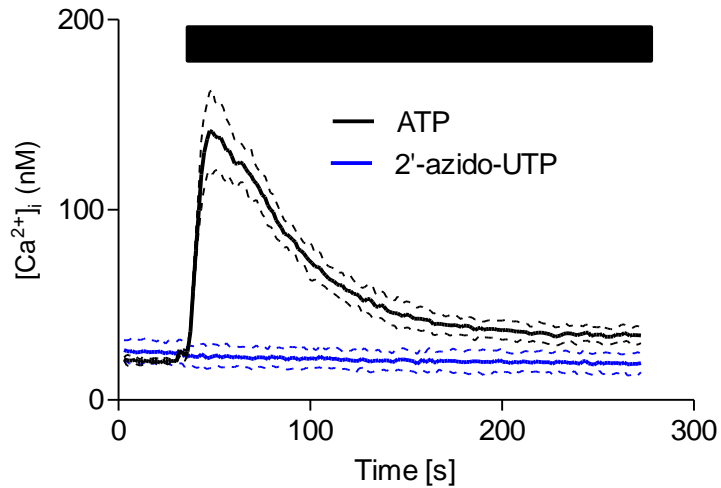

**Fig. S5** 2'-azido-UTP does not evoke  $\text{Ca}^{2+}$  signals. Responses of cell populations in HBS to ATP (100  $\mu\text{M}$ ) or 2'-azido-UTP (100  $\mu\text{M}$ , a selective agonist of  $\text{P2Y}_4$  receptors). Traces show  $[\text{Ca}^{2+}]_i$  as means (solid lines)  $\pm$  SEM (dashed lines),  $n = 4$ .

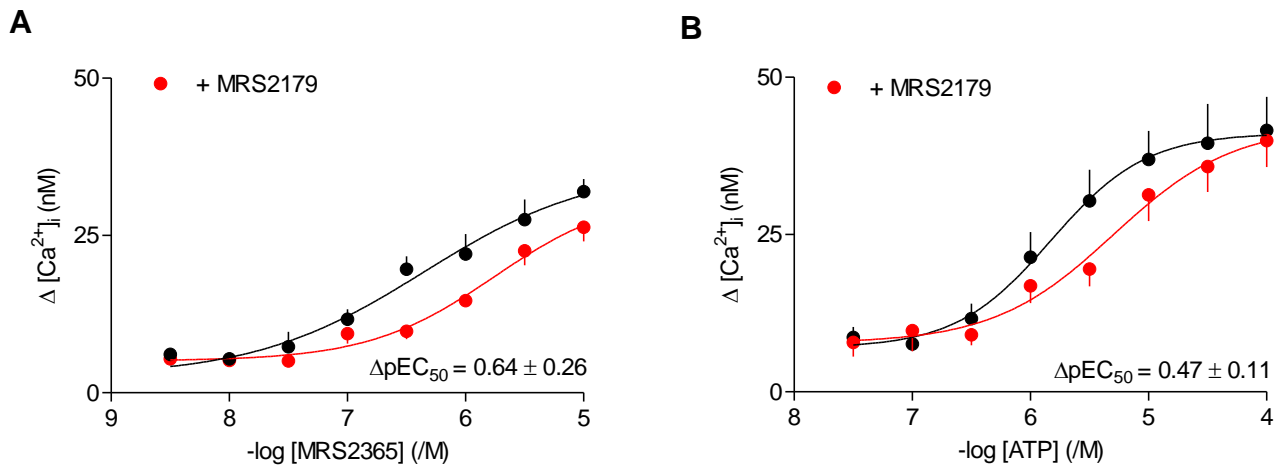

**Fig. S6** Effects of MRS2179, a selective antagonist of  $\text{P2Y}_1$  receptors, on the  $\text{Ca}^{2+}$  signals evoked by ATP and MRS2365. (A, B) Summary results (mean  $\pm$  SEM,  $n = 6-7$ ) from astrocytes taken from donor 0000514417 show the effects of MRS2179 (5  $\mu\text{M}$ , added 5 min before stimulation) on the peak  $\text{Ca}^{2+}$  signals evoked by MRS2365 (A) or ATP (B).  $\Delta\text{pEC}_{50}$  values are shown, where  $\Delta\text{pEC}_{50} = \text{pEC}_{50}^{+\text{MRS2179}} - \text{pEC}_{50}^{\text{control}}$ . The results show that the selective  $\text{P2Y}_1$  agonist, MRS2365, evokes smaller  $\text{Ca}^{2+}$  signals that are more susceptible to inhibition by MRS2179 than those evoked by ATP. Traces show  $[\text{Ca}^{2+}]_i$  as means (solid lines)  $\pm$  SEM (dashed lines).
